# Supplementary material for: mTOR Signaling in BDNF-Treated Guinea Pigs after Ototoxic Deafening
Source: MDPI journal article supplement (doi:10.3390/biomedicines10112935), 2022-11-15

Supplementary Material

Supplementary Figure S1

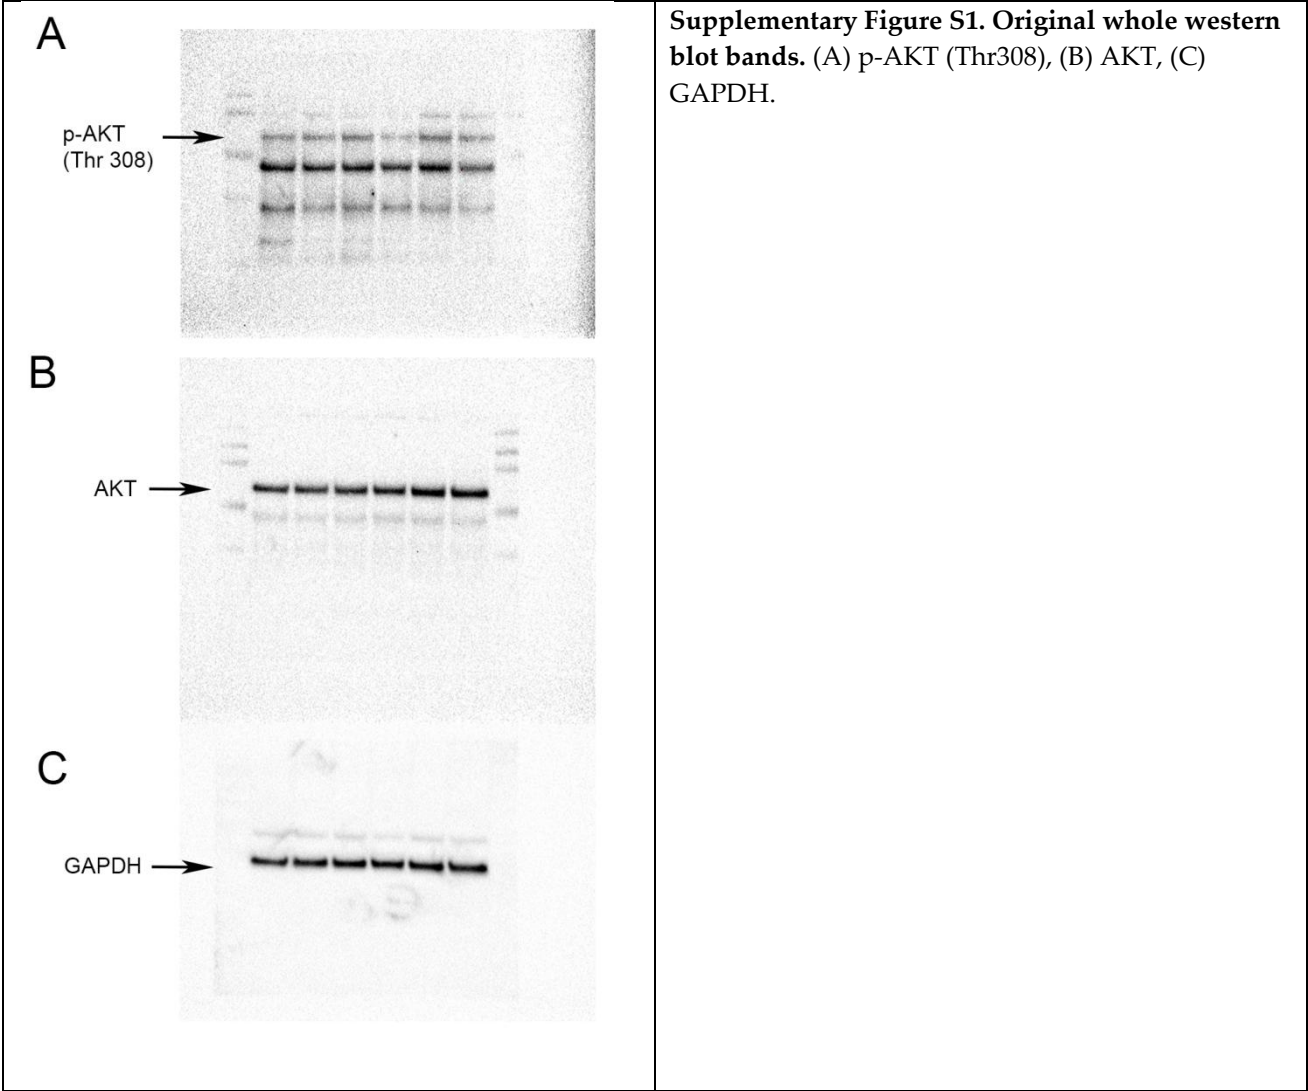



Supplementary Figure S2

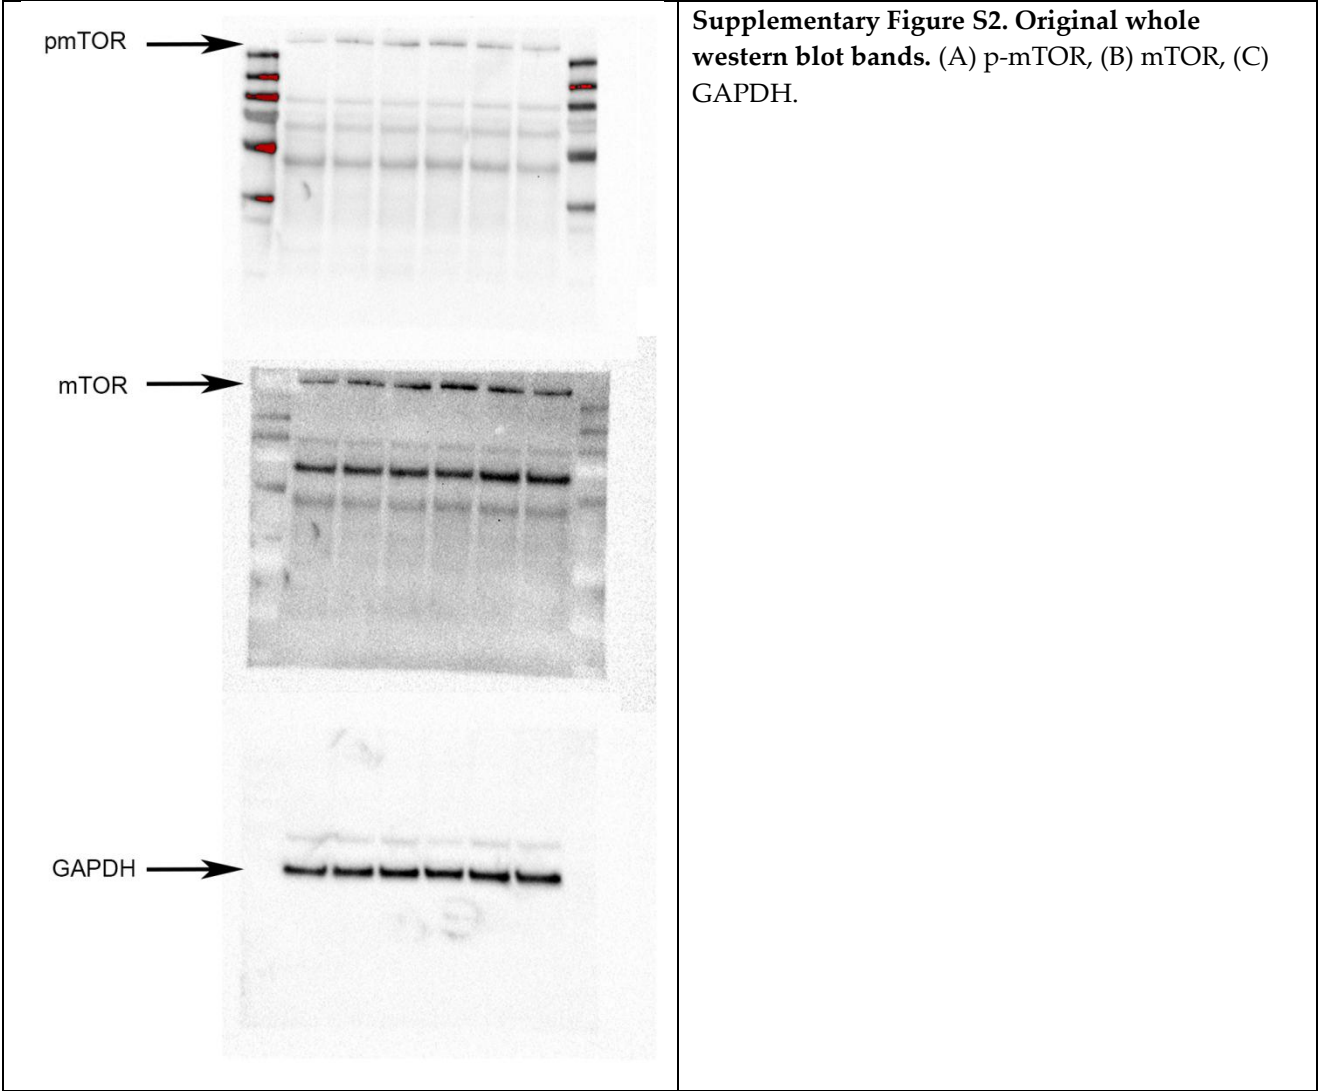



Supplementary Figure S3

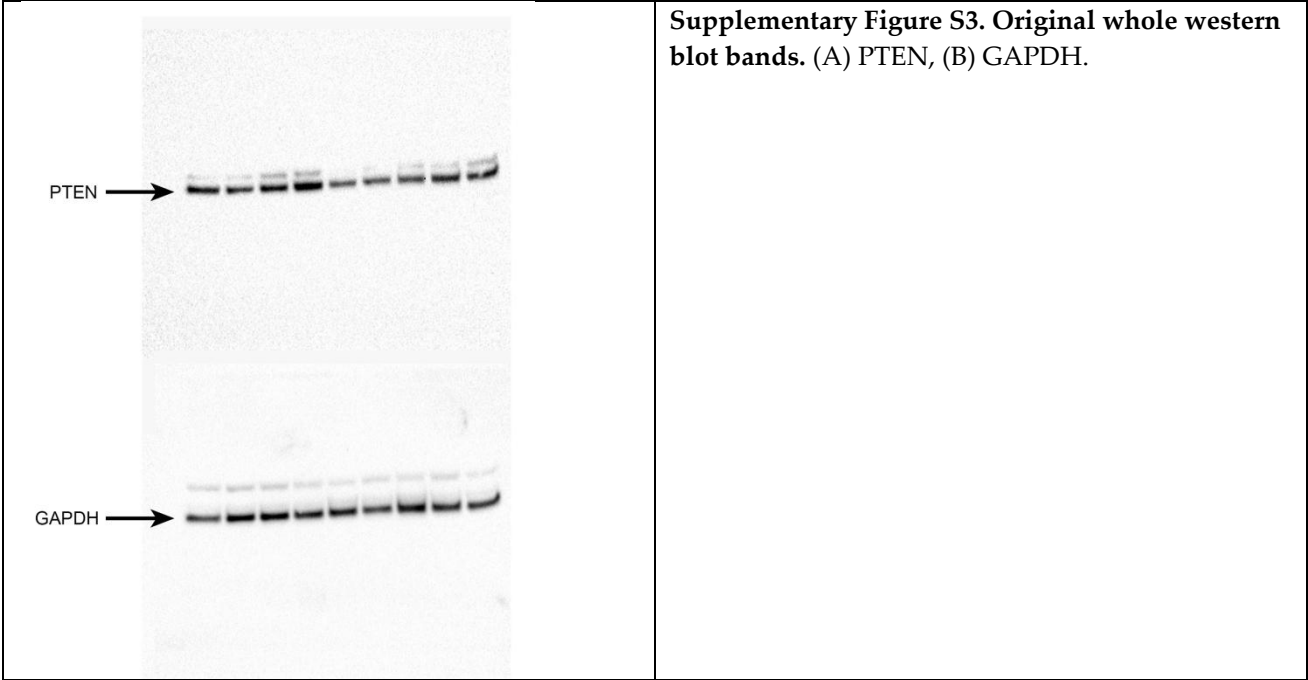

Supplement: s1 [file s1]
